# Supplementary material
Source: publisher site journal article supplement (https://www.spandidos-publications.com/7524/downloadSupplementary)

Figure S1. Leave-one-out sensitivity analysis for the association between telomere length and basal cell carcinoma risk. OR, odds ratio; CI, confidence interval; NHS, Nurses' Health Study.

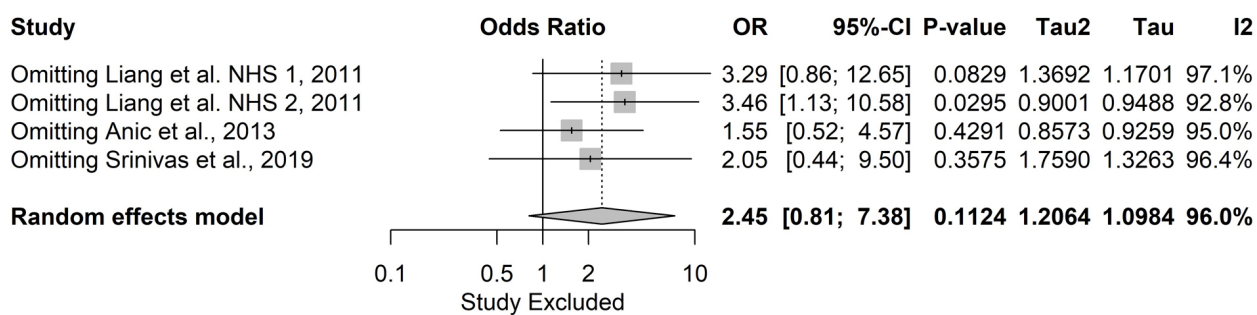

Figure S2. Leave-one-out sensitivity analysis for the association between telomere length and squamous cell carcinoma risk. OR, odds ratio; CI, confidence interval; HPFS, Health Professionals Follow-up Study.

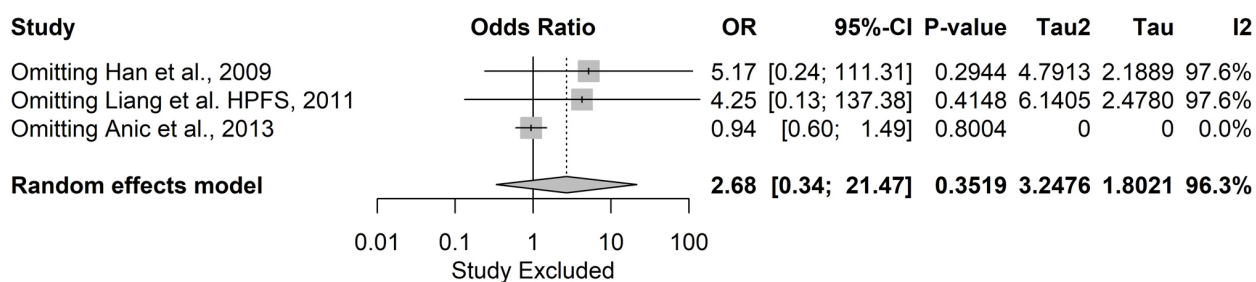

Supplement: Supplementary file 1 [file downloadSupplementary]
